# Supplementary material for: Nonlinear elasticity and cavitation of a triblock copolymer gel
Source: Royal Society of Chemistry journal article supplement (doi:10.1039/c5sm00330j), 2015-01-01
Supplement: c5sm00330j1.pdf [file c5sm00330j1.pdf]

Electronic Supplementary Information (ESI)

## Nonlinear Elasticity and Cavitation of a Triblock Copolymer Gel

*Seyed Meysam Hashemnejad, Santanu Kundu*

Dave C. Swalm School of Chemical Engineering, Mississippi State University, MS State, MS

**Gelation temperature:** Figure S1 displays storage ( $G'_1$ ) and loss ( $G''_1$ ) moduli as a function of temperature ramp during cooling at 2°C/min for a sample with polymer volume fraction ( $\phi$ ) of 0.05. At  $T = 33^\circ\text{C}$ ,  $G'_1 = G''_1$ , is considered as the gelation temperature for this gel.

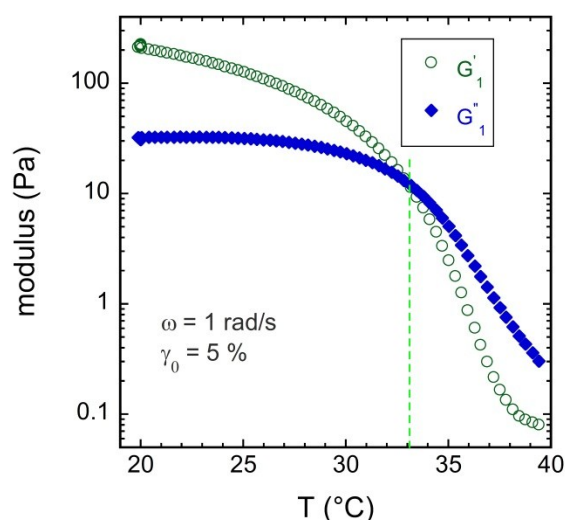

**Figure S1:** Storage ( $G'_1$ ) and loss ( $G''_1$ ) moduli as a function of temperature during cooling at 2°C/min.

**Modulus Independency of geometry:** Figure S2 compares the results obtained from 25 mm parallel plate and cone-plate geometries. Both these results are comparable.

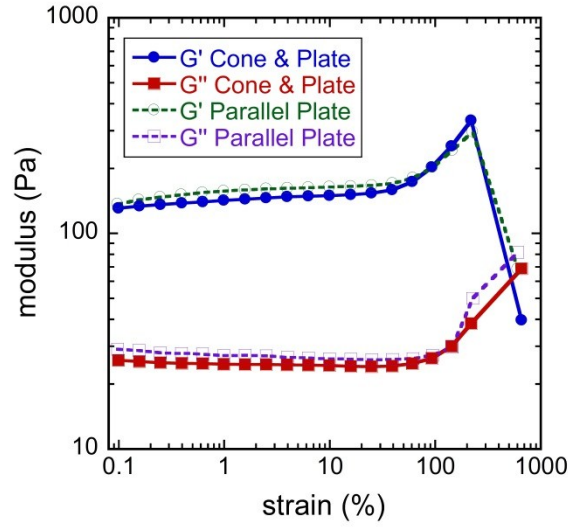

**Figure S2:** Storage ( $G'$ ) and loss ( $G''$ ) moduli for parallel and cone plate geometries; 22°C,  $\phi = 0.05$ .

**Moduli as a function of frequency:** Figure S3 displays the results from frequency sweep tests at different strain amplitude values ( $\gamma_0 = 0.5, 10$  and 200%) and temperatures (22°C and 6°C).

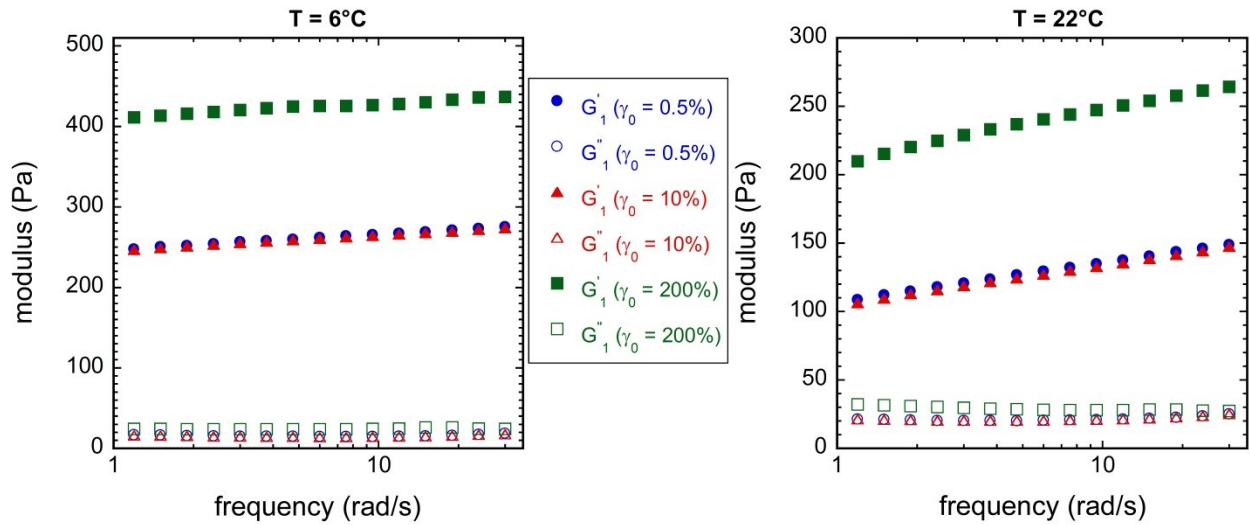

**Figure S3:** Storage ( $G'$ ) and loss ( $G''$ ) moduli as a function of frequency a) 6°C and b) 22°C. ( $\phi = 0.05$ )

**Fracture of gel under shear deformation:** Figure S4 displays the initiation and propagation of fracture in the bulk gel captured using a high-speed camera.

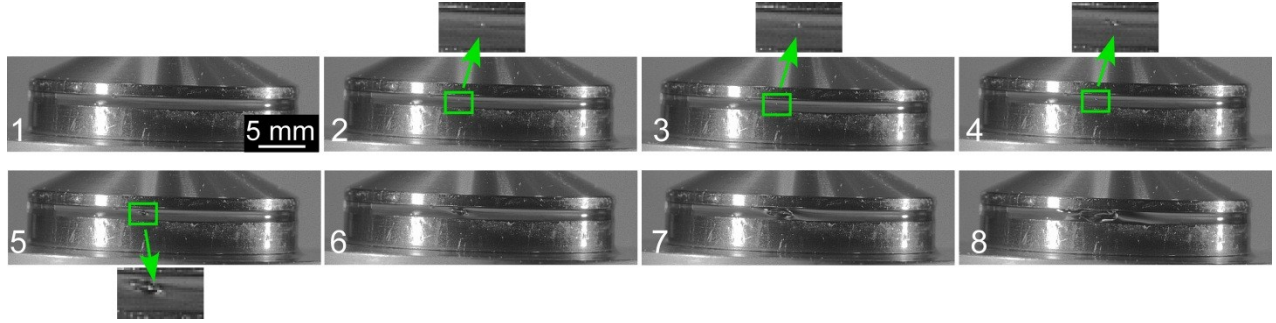

**Figure S4:** Micrographs of fracture initiation and propagation during the LAOS test, 1) zero strain value, 2) initiation of a defect or localized failure, 3-8) propagation of failure until the ultimate fracture. ( $\omega = 1 \text{ rad/s}$ ,  $\phi = 0.05$ ,  $T = 22^\circ\text{C}$ )

**Effect of polymer volume fraction on rheological behavior:** Figure S5 displays storage modulus from LAOS experiments for different polymer volume fraction ( $\phi$ ). Increasing polymer concentration results in increasing elastic modulus.

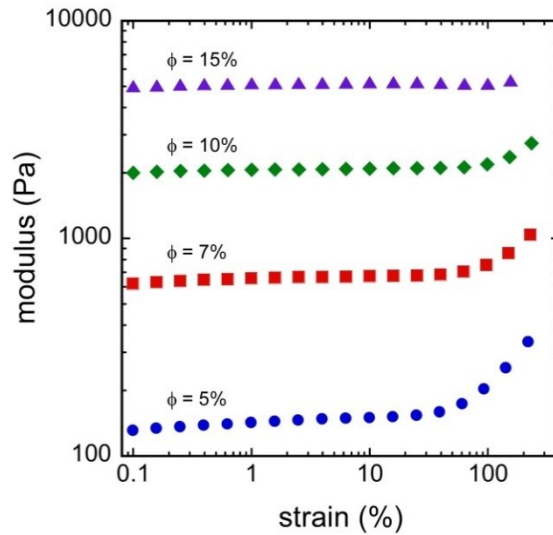

**Figure S5:** Elastic moduli for different polymer volume fractions ( $\phi$ ) at  $22^\circ\text{C}$  and at a frequency of  $1 \text{ rad/s}$ .

**Prediction of elastic modulus using surface energy of solvent:** For neo-Hookean gel,  $P_c = \frac{5}{6}E + \frac{2\Gamma}{r_{in}}$

(Eq. 17) and considering surface energy of pure solvent ( $0.026 \text{ J/m}^2$ ), the estimated Young's modulus ( $E_{cavitation}$ ) is found to be higher than that measured by shear-rheology ( $E_{rheology}$ ). Figure S6 shows the

ratio of Young's modulus estimated from cavitation experimental data using Eq. 17 ( $E_{cavitation}$ ) and that obtained from shear-rheology ( $E_{rheology}$ ) for different temperatures, and compression rates.

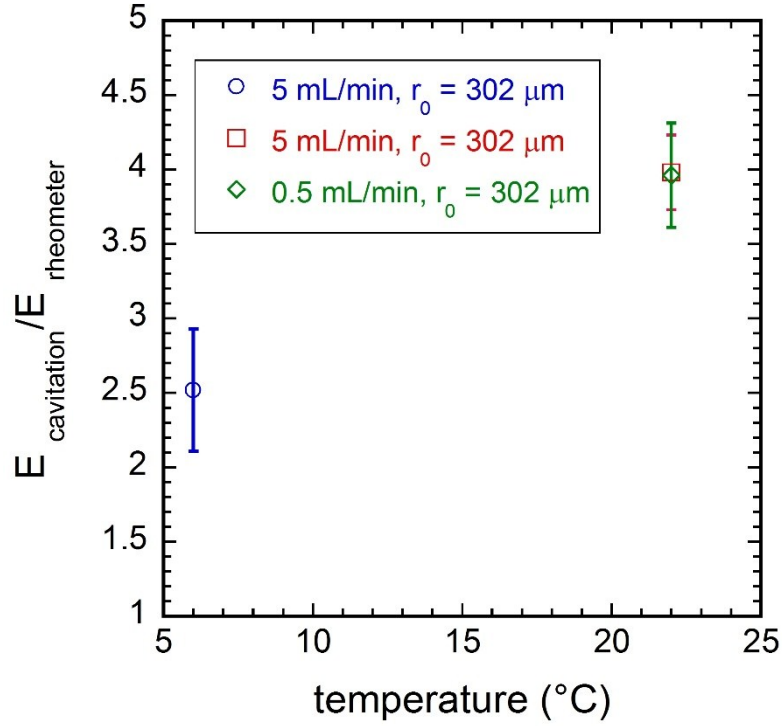

**Figure S6:** Ratio of shear-moduli estimated from cavitation data with respect to that obtained from shear-rheology for different temperatures, and compression rates. Here, shear modulus  $G = E/2(1 + \nu)$ , where  $\nu$  is poison ratio, considered to be equal to 0.5. Eq. 17 with  $\Gamma = 0.026 \text{ J/m}^2$  (surface energy of pure solvent) was used to estimate  $E_{cavitation}$ .
